# Supplementary material for: Maternal control of suspensor programmed cell death via gibberellin signaling
Source: PubMed Central journal article supplement (PMC6677759; doi:10.1038/s41467-019-11476-3), 2019-08-02
Supplement: 41467_2019_11476_MOESM2_ESM.pdf [file 41467_2019_11476_MOESM2_ESM.pdf]

## **Description of Additional Supplementary Files**

File Name: Supplementary Data 1

Description: The primers in the study.
